# Supplementary material
Source: PubMed Central journal article supplement (PMC3859429)
Supplement: NIHMS526207-supplement-01.pdf [file NIHMS526207-supplement-01.pdf]

# Adverse Pregnancy Outcomes Following Motor Vehicle Crashes

Catherine J. Vladutiu, PhD, Stephen W. Marshall, PhD, Charles Poole, ScD, Carri Casteel, PhD,  
M. Kathryn Menard, MD, Harold B. Weiss, PhD

## Appendix A

### Sensitivity analysis of under-ascertainment of first motor vehicle crash during pregnancy

| Differential ascertainment of motor vehicle crashes (sensitivity) |                                               | "Corrected" crude rate ratios for selected adverse pregnancy outcomes |            |                     |      |
|-------------------------------------------------------------------|-----------------------------------------------|-----------------------------------------------------------------------|------------|---------------------|------|
| Among referent level of unknown covariate (%)                     | Among exposure level of unknown covariate (%) | Preterm birth                                                         | Stillbirth | Placental abruption | PROM |
| 100 <sup>a</sup>                                                  | 100 <sup>a</sup>                              | 1.24                                                                  | 1.05       | 1.34                | 1.31 |
| 90                                                                | 80                                            | 1.25                                                                  | 1.06       | 1.35                | 1.31 |
| 90                                                                | 70                                            | 1.25                                                                  | 1.06       | 1.35                | 1.31 |
| 80                                                                | 90                                            | 1.24                                                                  | 1.05       | 1.35                | 1.31 |
| 80                                                                | 70                                            | 1.25                                                                  | 1.06       | 1.35                | 1.31 |
| 80                                                                | 60                                            | 1.25                                                                  | 1.06       | 1.35                | 1.31 |
| 80                                                                | 50                                            | 1.26                                                                  | 1.07       | 1.36                | 1.30 |
| 70                                                                | 90                                            | 1.24                                                                  | 1.05       | 1.35                | 1.32 |
| 70                                                                | 80                                            | 1.24                                                                  | 1.05       | 1.35                | 1.32 |
| 70                                                                | 50                                            | 1.26                                                                  | 1.06       | 1.36                | 1.31 |
| 60                                                                | 80                                            | 1.24                                                                  | 1.05       | 1.35                | 1.32 |
| 60                                                                | 50                                            | 1.25                                                                  | 1.06       | 1.36                | 1.31 |
| 60                                                                | 40                                            | 1.26                                                                  | 1.06       | 1.36                | 1.31 |

<sup>a</sup>Assumes complete ascertainment of crashes (as observed in the data)

PROM, premature rupture of the membranes
